# Supplementary material for: Focal dose escalation for prostate cancer using 68Ga-HBED-CC PSMA PET/CT and MRI: a planning study based on histology reference
Source: PubMed Central journal article supplement (PMC5930745; doi:10.1186/s13014-018-1036-8), 2018-05-02
Supplement: 13014_2018_1036_MOESM2_ESM.pdf [file 13014_2018_1036_MOESM2_ESM.pdf]

## 1. FLAME protocol

| Patient  | Dose              | PTV-PET      | PTV-MR       | PTV-Union    |
|----------|-------------------|--------------|--------------|--------------|
| <b>1</b> | <i>Dmin (Gy)</i>  | 73.01        | 80.87        | 72.52        |
|          | <i>D98% (Gy)</i>  | 81.17        | 89.63        | 79.32        |
|          | <i>D95% (Gy)</i>  | 85.46        | 90.60        | 84.17        |
|          | <i>D50% (Gy)</i>  | 94.74        | 97.10        | 94.48        |
|          | <i>D2% (Gy)</i>   | 98.00        | 100.83       | 98.96        |
|          | <i>Dmax (Gy)</i>  | 100.02       | 104.25       | 101.46       |
|          | <b>Dmean (Gy)</b> | <b>93.25</b> | <b>96.33</b> | <b>93.10</b> |
| <b>2</b> | <i>Dmin (Gy)</i>  | 71.58        | 82.27        | 59.96        |
|          | <i>D98% (Gy)</i>  | 82.67        | 87.92        | 72.84        |
|          | <i>D95% (Gy)</i>  | 86.15        | 88.81        | 78.62        |
|          | <i>D50% (Gy)</i>  | 95.94        | 94.66        | 94.75        |
|          | <i>D2% (Gy)</i>   | 99.90        | 98.44        | 99.61        |
|          | <i>Dmax (Gy)</i>  | 101.51       | 101.41       | 102.13       |
|          | <b>Dmean (Gy)</b> | <b>94.69</b> | <b>94.05</b> | <b>92.90</b> |
| <b>3</b> | <i>Dmin (Gy)</i>  | 73.17        | 66.70        | 78.83        |
|          | <i>D98% (Gy)</i>  | 83.89        | 80.21        | 79.68        |
|          | <i>D95% (Gy)</i>  | 85.96        | 84.72        | 84.76        |
|          | <i>D50% (Gy)</i>  | 95.19        | 94.73        | 95.06        |
|          | <i>D2% (Gy)</i>   | 98.26        | 97.58        | 98.09        |
|          | <i>Dmax (Gy)</i>  | 99.98        | 100.07       | 100.09       |
|          | <b>Dmean (Gy)</b> | <b>93.64</b> | <b>93.10</b> | <b>93.46</b> |
| <b>4</b> | <i>Dmin (Gy)</i>  | 84.24        | 81.64        | 77.64        |
|          | <i>D98% (Gy)</i>  | 88.65        | 86.33        | 85.97        |
|          | <i>D95% (Gy)</i>  | 89.44        | 87.97        | 86.90        |
|          | <i>D50% (Gy)</i>  | 94.17        | 94.89        | 92.90        |
|          | <i>D2% (Gy)</i>   | 98.22        | 97.80        | 97.91        |
|          | <i>Dmax (Gy)</i>  | 100.05       | 100.28       | 99.79        |
|          | <b>Dmean (Gy)</b> | <b>93.88</b> | <b>93.94</b> | <b>92.61</b> |
| <b>5</b> | <i>Dmin (Gy)</i>  | 88.01        | 87.52        | 88.48        |
|          | <i>D98% (Gy)</i>  | 90.85        | 90.18        | 91.03        |
|          | <i>D95% (Gy)</i>  | 91.66        | 90.85        | 91.74        |
|          | <i>D50% (Gy)</i>  | 96.17        | 95.28        | 96.25        |
|          | <i>D2% (Gy)</i>   | 100.05       | 98.20        | 99.92        |
|          | <i>Dmax (Gy)</i>  | 102.48       | 99.17        | 101.30       |
|          | <b>Dmean (Gy)</b> | <b>95.91</b> | <b>94.88</b> | <b>95.97</b> |
| <b>6</b> | <i>Dmin (Gy)</i>  | 80.94        | 82.56        | 80.22        |
|          | <i>D98% (Gy)</i>  | 88.21        | 89.62        | 86.71        |
|          | <i>D95% (Gy)</i>  | 89.90        | 90.43        | 89.33        |
|          | <i>D50% (Gy)</i>  | 95.89        | 94.53        | 96.19        |
|          | <i>D2% (Gy)</i>   | 100.82       | 97.75        | 99.67        |
|          | <i>Dmax (Gy)</i>  | 103.61       | 100.72       | 101.76       |
|          | <b>Dmean (Gy)</b> | <b>95.53</b> | <b>94.17</b> | <b>95.38</b> |
| <b>7</b> | <i>Dmin (Gy)</i>  | 77.51        | 86.41        | 80.29        |
|          | <i>D98% (Gy)</i>  | 88.31        | 89.68        | 88.39        |

|           |                   |              |              |              |
|-----------|-------------------|--------------|--------------|--------------|
|           | <i>D95% (Gy)</i>  | 89.83        | 90.48        | 89.58        |
|           | <i>D50% (Gy)</i>  | 95.33        | 95.46        | 95.98        |
|           | <i>D2% (Gy)</i>   | 98.97        | 99.11        | 99.85        |
|           | <i>Dmax (Gy)</i>  | 102.95       | 100.90       | 102.23       |
|           | <b>Dmean (Gy)</b> | <b>94.79</b> | <b>95.02</b> | <b>95.33</b> |
| <b>8</b>  | <i>Dmin (Gy)</i>  | 83.65        | 86.99        | 83.66        |
|           | <i>D98% (Gy)</i>  | 89.38        | 90.26        | 89.55        |
|           | <i>D95% (Gy)</i>  | 90.39        | 90.92        | 90.51        |
|           | <i>D50% (Gy)</i>  | 96.75        | 96.02        | 97.25        |
|           | <i>D2% (Gy)</i>   | 101.40       | 100.40       | 102.13       |
|           | <i>Dmax (Gy)</i>  | 104.46       | 103.75       | 105.45       |
|           | <b>Dmean (Gy)</b> | <b>96.19</b> | <b>95.70</b> | <b>96.62</b> |
| <b>9</b>  | <i>Dmin (Gy)</i>  | 78.88        | 82.13        | 78.61        |
|           | <i>D98% (Gy)</i>  | 86.03        | 87.07        | 85.56        |
|           | <i>D95% (Gy)</i>  | 87.34        | 88.25        | 87.14        |
|           | <i>D50% (Gy)</i>  | 95.50        | 95.54        | 95.78        |
|           | <i>D2% (Gy)</i>   | 99.56        | 99.66        | 99.69        |
|           | <i>Dmax (Gy)</i>  | 102.07       | 101.19       | 102.05       |
|           | <b>Dmean (Gy)</b> | <b>94.37</b> | <b>94.82</b> | <b>94.59</b> |
| <b>10</b> | <i>Dmin (Gy)</i>  | 74.49        | 82.70        | 72.78        |
|           | <i>D98% (Gy)</i>  | 83.07        | 87.30        | 82.57        |
|           | <i>D95% (Gy)</i>  | 85.21        | 88.38        | 85.82        |
|           | <i>D50% (Gy)</i>  | 93.58        | 96.17        | 95.76        |
|           | <i>D2% (Gy)</i>   | 101.29       | 99.47        | 99.20        |
|           | <i>Dmax (Gy)</i>  | 102.94       | 101.34       | 101.32       |
|           | <b>Dmean (Gy)</b> | <b>93.47</b> | <b>95.12</b> | <b>94.25</b> |

## 2. Pinkawa protocol

| Patient  | Dose              | PTV-PET      | PTV-MR       | PTV-Union    |
|----------|-------------------|--------------|--------------|--------------|
| <b>1</b> | <i>Dmin (Gy)</i>  | 71.96        | 74.06        | 71.88        |
|          | <i>D98% (Gy)</i>  | 75.02        | 77.57        | 75.87        |
|          | <i>D95% (Gy)</i>  | 76.40        | 77.94        | 77.27        |
|          | <i>D50% (Gy)</i>  | 79.84        | 79.63        | 80.19        |
|          | <i>D2% (Gy)</i>   | 82.55        | 81.93        | 82.56        |
|          | <i>Dmax (Gy)</i>  | 84.17        | 84.56        | 83.96        |
|          | <b>Dmean (Gy)</b> | <b>79.71</b> | <b>79.66</b> | <b>80.06</b> |
| <b>2</b> | <i>Dmin (Gy)</i>  | 72.98        | 73.90        | 72.20        |
|          | <i>D98% (Gy)</i>  | 75.39        | 78.22        | 75.78        |
|          | <i>D95% (Gy)</i>  | 77.64        | 78.55        | 77.90        |
|          | <i>D50% (Gy)</i>  | 80.80        | 80.25        | 80.61        |
|          | <i>D2% (Gy)</i>   | 83.16        | 82.88        | 83.17        |
|          | <i>Dmax (Gy)</i>  | 84.44        | 84.64        | 84.76        |
|          | <b>Dmean (Gy)</b> | <b>80.58</b> | <b>80.35</b> | <b>80.50</b> |
| <b>3</b> | <i>Dmin (Gy)</i>  | 73.53        | 70.27        | 70.59        |
|          | <i>D98% (Gy)</i>  | 76.71        | 75.05        | 74.43        |

|          |                   |              |              |              |
|----------|-------------------|--------------|--------------|--------------|
|          | <i>D95% (Gy)</i>  | 78.00        | 76.95        | 76.80        |
|          | <i>D50% (Gy)</i>  | 80.48        | 80.08        | 80.32        |
|          | <i>D2% (Gy)</i>   | 82.78        | 82.45        | 82.81        |
|          | <i>Dmax (Gy)</i>  | 84.07        | 84.91        | 84.58        |
|          | <b>Dmean (Gy)</b> | <b>80.32</b> | <b>79.90</b> | <b>80.05</b> |
| <b>4</b> | <i>Dmin (Gy)</i>  | 74.66        | 70.65        | 73.09        |
|          | <i>D98% (Gy)</i>  | 78,72        | 76.65        | 77.62        |
|          | <i>D95% (Gy)</i>  | 79.20        | 77.44        | 78.27        |
|          | <i>D50% (Gy)</i>  | 81.00        | 80.22        | 80.31        |
|          | <i>D2% (Gy)</i>   | 83.90        | 83.40        | 82.74        |
|          | <i>Dmax (Gy)</i>  | 85.97        | 84.99        | 84.19        |
|          | <b>Dmean (Gy)</b> | <b>81.07</b> | <b>80.17</b> | <b>80.25</b> |
| <b>5</b> | <i>Dmin (Gy)</i>  | 76.59        | 76.58        | 77.37        |
|          | <i>D98% (Gy)</i>  | 78.37        | 78.17        | 78.53        |
|          | <i>D95% (Gy)</i>  | 78.62        | 78.45        | 78.77        |
|          | <i>D50% (Gy)</i>  | 80.22        | 80.12        | 80.14        |
|          | <i>D2% (Gy)</i>   | 82,61        | 82.85        | 82.72        |
|          | <i>Dmax (Gy)</i>  | 83.91        | 83.79        | 83.20        |
|          | <b>Dmean (Gy)</b> | <b>80.32</b> | <b>80.27</b> | <b>80.36</b> |
| <b>6</b> | <i>Dmin (Gy)</i>  | 73.53        | 73.48        | 72.84        |
|          | <i>D98% (Gy)</i>  | 73.51        | 75.97        | 74.96        |
|          | <i>D95% (Gy)</i>  | 75.85        | 77.40        | 76.44        |
|          | <i>D50% (Gy)</i>  | 80.07        | 79.73        | 79.91        |
|          | <i>D2% (Gy)</i>   | 83.10        | 82.52        | 82.61        |
|          | <i>Dmax (Gy)</i>  | 84.72        | 84.01        | 84.42        |
|          | <b>Dmean (Gy)</b> | <b>79.77</b> | <b>79.83</b> | <b>79.77</b> |
| <b>7</b> | <i>Dmin (Gy)</i>  | 72.60        | 76.93        | 72.33        |
|          | <i>D98% (Gy)</i>  | 77.48        | 78.21        | 77.71        |
|          | <i>D95% (Gy)</i>  | 78.25        | 78.45        | 78.81        |
|          | <i>D50% (Gy)</i>  | 79.89        | 79.94        | 80.10        |
|          | <i>D2% (Gy)</i>   | 82.85        | 82.15        | 82.87        |
|          | <i>Dmax (Gy)</i>  | 84.54        | 82.93        | 83.94        |
|          | <b>Dmean (Gy)</b> | <b>79.99</b> | <b>80.03</b> | <b>80.14</b> |
| <b>8</b> | <i>Dmin (Gy)</i>  | 72.18        | 74.73        | 72.17        |
|          | <i>D98% (Gy)</i>  | 77.36        | 77.77        | 77.29        |
|          | <i>D95% (Gy)</i>  | 78.15        | 78.24        | 78.05        |
|          | <i>D50% (Gy)</i>  | 80.14        | 80.09        | 80.37        |
|          | <i>D2% (Gy)</i>   | 83.13        | 82.95        | 83.18        |
|          | <i>Dmax (Gy)</i>  | 84.75        | 84.39        | 84.56        |
|          | <b>Dmean (Gy)</b> | <b>80.28</b> | <b>80.20</b> | <b>80.31</b> |
| <b>9</b> | <i>Dmin (Gy)</i>  | 72.97        | 73.65        | 72.73        |
|          | <i>D98% (Gy)</i>  | 75.91        | 76.82        | 75.81        |
|          | <i>D95% (Gy)</i>  | 77.24        | 77.81        | 77.26        |
|          | <i>D50% (Gy)</i>  | 80.01        | 80.18        | 80.14        |
|          | <i>D2% (Gy)</i>   | 83.18        | 83.05        | 83.28        |
|          | <i>Dmax (Gy)</i>  | 85.90        | 85.82        | 85.01        |
|          | <b>Dmean (Gy)</b> | <b>79.98</b> | <b>80.18</b> | <b>80.05</b> |

|           |                   |              |              |              |
|-----------|-------------------|--------------|--------------|--------------|
| <b>10</b> | <i>Dmin (Gy)</i>  | 72.59        | 75.78        | 71.69        |
|           | <i>D98% (Gy)</i>  | 75.89        | 78.23        | 76.32        |
|           | <i>D95% (Gy)</i>  | 77.74        | 78.68        | 77.84        |
|           | <i>D50% (Gy)</i>  | 80.75        | 80.51        | 80.5         |
|           | <i>D2% (Gy)</i>   | 83.92        | 82.87        | 83.16        |
|           | <i>Dmax (Gy)</i>  | 86.92        | 83.98        | 85.51        |
|           | <b>Dmean (Gy)</b> | <b>80.63</b> | <b>80.52</b> | <b>80.37</b> |
