# Supplementary material for: Focal dose escalation for prostate cancer using 68Ga-HBED-CC PSMA PET/CT and MRI: a planning study based on histology reference
Source: PubMed Central journal article supplement (PMC5930745; doi:10.1186/s13014-018-1036-8), 2018-05-02
Supplement: 13014_2018_1036_MOESM3_ESM.pdf [file 13014_2018_1036_MOESM3_ESM.pdf]

## A. Additional information on TCP calculation

GTV was considered to be the histopathology proven and defined cancer volume in the prostate. TCP was calculated according to the Poisson distribution as [17-21]:

$$TCP = P_B = P_{GTV}(\{D\}, V) = \prod_{i=1}^M e^{-\rho_{cell} \Delta V_i P(D_i)}$$

With  $P(D_i)$  the survival probability for the dose  $D_i$  [18,19]:

$$P(D_i) = e^{-\left(\frac{EQD2_i}{D50}\right)(e\gamma - \ln \ln 2)} \quad \text{or equivalently} \quad P(D_i) = e^{-a EQD2_i \left(1 + \frac{2Gy}{\alpha/\beta}\right)}$$

M was the total number of voxels within GTV or of bins of the differential dose volume histogram for total dose in the GTV.  $\rho_{cell}$  represented the cancer cell density in GTV and  $\Delta V_i$  was the voxel volume or the total volume corresponding to the  $i^{th}$  dose bin. D50 was the equieffective dose for 2Gy per fraction resulting to 50% tumor control probability and  $\gamma$  was the maximum normalized dose-response gradient [19,26]. EQD2<sub>i</sub> was the equieffective dose for 2Gy per fraction for the total dose  $D_i$  for the  $i^{th}$ -voxel or  $i^{th}$ -dose bin [9,21]:

$$EQD2_i = D_i \left(1 + \frac{D_i/N}{\alpha/\beta}\right) / \left(1 + \frac{2Gy}{\alpha/\beta}\right)$$

With N the total number of fractions for delivering the total dose  $D_i$ .  $\alpha/\beta$  values described the curvature of the cell survival curve described by the linear-quadratic model, where  $\alpha$  described the slope of the initial linear part of the curve.

## B. Additional information on NTCP calculation

NTCP from non-uniform dose distributions were calculated using the relative seriality model [19,26-28]:

$$P_1 = 1 - \prod_{j=1}^{N_{organs}} (1 - P_1^j) = 1 - \prod_{j=1}^{N_{organs}} \left( 1 - \left[ 1 - \prod_{i=1}^{M_j} (1 - P^j(D_i)^{s_j})^{\Delta v_i} \right]^{1/s_j} \right)$$

With  $P(D_i)$  the complication probability rate for the dose  $D_i$  and was given by the same formula as for TCP, where here D50 is the equieffective dose for 2Gy per fraction resulting to 50% complication probability.  $\Delta v_i$  was the volume fraction being irradiated to dose  $D_i$  and  $s$  was the parameter which expresses the degree of seriality (the value varies from  $s$  close to zero for nearly parallel organs and upwards for increasing seriality).

The maximum normalized dose-response gradient  $\gamma$  in the survival probability function was be calculated from the parameter  $k$  of the corresponding logit probability distribution according to the following:

$$k = 4 \gamma_{50} \quad \text{and} \quad \gamma_{50} = \frac{\ln 2}{2}(e\gamma - \ln \ln 2), \quad \text{thus} \quad \gamma = \frac{\frac{k}{2\ln 2} + \ln \ln 2}{e}$$

with  $\gamma_{50}$  the slope of the dose-response curve at the 50% response level.
