# Supplementary material for: Focal dose escalation for prostate cancer using 68Ga-HBED-CC PSMA PET/CT and MRI: a planning study based on histology reference
Source: Springer Nature journal article supplement (doi:10.1186/s13014-018-1036-8), 2018-05-01
Supplement: MOESM1 [file 15733390]

| <b>Patient</b> | <b>Age (y)</b> | <b>PSA (ng/ml)</b> | <b>TNM</b>   | <b>Gleason score</b> |
|----------------|----------------|--------------------|--------------|----------------------|
| 1              | 67             | 6.1                | pT3a pN1 cM0 | 3+4 (7a)             |
| 2              | 61             | 10.6               | pT2c pN0 cM0 | 3+4 (7a)             |
| 3              | 52             | 51.1               | pT3b pN1 cM0 | 5+4 (9)              |
| 4              | 60             | 49.0               | pT2c pN1 cM0 | 3+4 (7a)             |
| 5              | 73             | 25.5               | pT2c pN0 cM0 | 3+4 (7a)             |
| 6              | 59             | 9.2                | pT2c pN0 cM0 | 4+3 (7b)             |
| 7              | 74             | 8.8                | pT2c pN0 cM0 | 3+4 (7a)             |
| 8              | 74             | 15.3               | pT2c pN0 cM0 | 3+4 (7a)             |
| 9              | 51             | 17.4               | pT3a pN0 cM0 | 4+3 (7b)             |
| 10             | 48             | 23.2               | pT3b pN1 cM0 | 4+3 (7b)             |
| Mean           | 61.4           | 21.5               |              |                      |
| SD ±           | 9.4            | 16.8               |              |                      |

Table S1. Patient characteristics
