# Supplementary material for: Focal dose escalation for prostate cancer using 68Ga-HBED-CC PSMA PET/CT and MRI: a planning study based on histology reference
Source: Springer Nature journal article supplement (doi:10.1186/s13014-018-1036-8), 2018-05-01

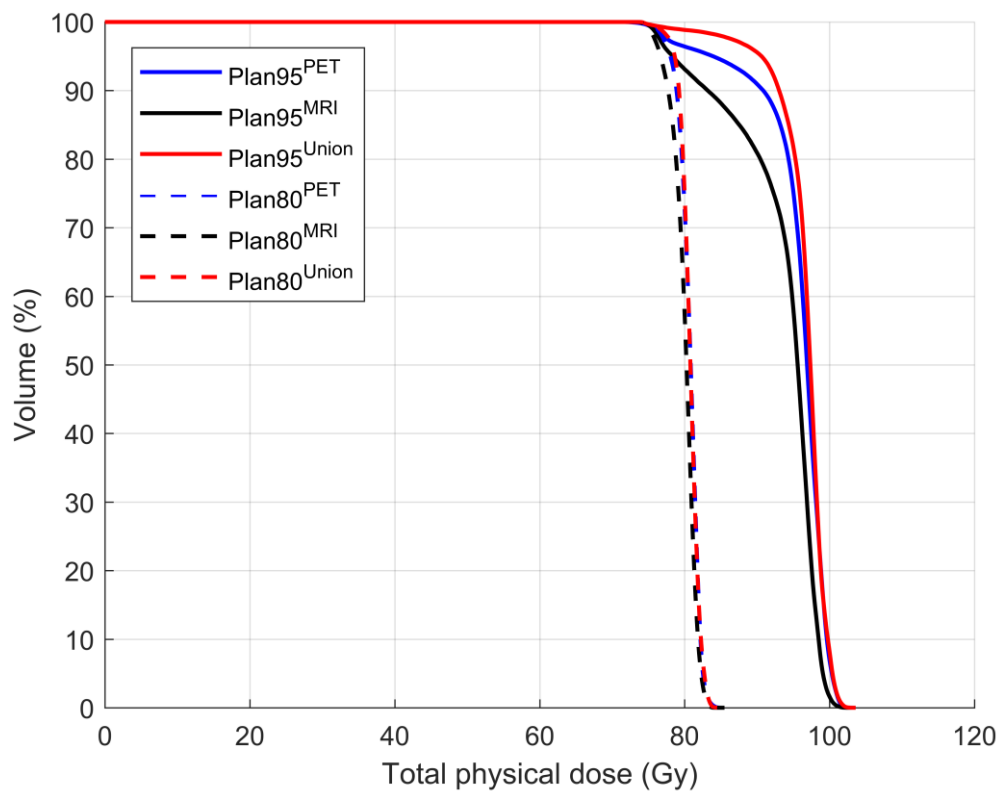

Supplement: MOESM4 [file 15733390]
